# Supplementary material for: Enhancing the sensitization efficiency of erbium doped organic complexes by heavy halogen substitution
Source: Royal Society of Chemistry journal article supplement (doi:10.1039/c8tc00971f), 2018-01-01
Supplement: c8tc00971f1.pdf [file c8tc00971f1.pdf]

## Enhancing the sensitization efficiency of erbium doped organic complexes by heavy halogen substitution

J. X. Hu,<sup>a</sup> S. Karamshuk,<sup>a,b</sup> J. Gorbaciova,<sup>a</sup> H. Q. Ye,<sup>a</sup> H. Lu,<sup>c</sup> Y. P. Zhang,<sup>a</sup> Y. X. Zheng,<sup>d</sup> X. Liang,<sup>d</sup> M. Motevalli,<sup>b</sup> I. Abrahams,<sup>b</sup> I. Hernández,<sup>e</sup> P. B. Wyatt<sup>\*b</sup> and W.P. Gillin<sup>\*a,f</sup>

### Supporting information

#### Contents

|                                                                                                                                                                                                         |    |
|---------------------------------------------------------------------------------------------------------------------------------------------------------------------------------------------------------|----|
| Chemical synthesis and characterization of zinc-containing chromophores                                                                                                                                 | S1 |
| Fig. S1 X-ray crystal structure of Zn(Br-FBTZ) <sub>2</sub> .                                                                                                                                           | S2 |
| Table S1 Crystal data and structure refinement for Zn(Br-FBTZ) <sub>2</sub>                                                                                                                             | S3 |
| Fig. S2 Triplet lifetime measured by a 5 ns pulse laser at 80K.                                                                                                                                         | S4 |
| Fig. S3 Fluorescence intensity comparison between Y(F-TPIP) <sub>3</sub> doped and Er(F-TPIP) <sub>3</sub> doped Zn(FBTZ) <sub>2</sub> , Zn(Cl-FBTZ) <sub>2</sub> and Zn(Br-FBTZ) <sub>2</sub> samples. | S5 |
| Fig. S4 Sensitisation data for the (a) 43%, (b) 64% and (c) 80% Er(F-TPIP) <sub>3</sub> doped films for each chromophore. The solid lines are the fits from the model.                                  | S6 |
| References                                                                                                                                                                                              | S7 |

---

<sup>a</sup> Materials Research Institute and School of Physics and Astronomy, Queen Mary University of London, Mile End Road, London E1 4NS, UK.

<sup>b</sup> Materials Research Institute and School of Biological and Chemical Sciences, Queen Mary University of London, Mile End Road, London E1 4NS, UK.

<sup>c</sup> State Key Laboratory of ASIC and System, SIST, Fudan University, Shanghai 200433, China.

<sup>d</sup> State Key Laboratory of Coordination Chemistry, Nanjing National Laboratory of Microstructures, School of Chemistry and Chemical Engineering, Nanjing University, Nanjing 210093, China.

<sup>e</sup> Dpto. CITIMAC, Facultad de Ciencias, Universidad de Cantabria, Avda. Los Castros, s/n 39005 Santander, Spain.

<sup>f</sup> College of Physical Science and Technology, Sichuan University, Chengdu 610064, China.

## Chemical synthesis and characterization of zinc-containing chromophores

Zn(FBTZ)<sub>2</sub> was prepared from pentafluoroaniline and the known<sup>S1</sup> 6-methoxy-2,3,4,5-tetrafluorobenzyl chloride, as previously described;<sup>S2</sup> Zn(Cl-FTPIP)<sub>2</sub> and Zn(Br-FTPIP)<sub>2</sub> were prepared analogously.

### Zn(Cl-FBTZ)<sub>2</sub>

Yellow solid, mp > 300 °C

$\nu_{\max}/\text{cm}^{-1}$  1659, 1493, 1403, 1269, 1252, 1198, 1053, 1005, 942, 830, 752, 667;

$\delta_{\text{F}}$  (367 MHz, DMSO-*d*<sub>6</sub>) -119.1 (dd, *J* 16, 3 Hz), -142.6 - -142.7 (m, 2F), -152.0 (dd, *J* 21, 16 Hz), -159.7 (td, *J* 23, 3 Hz), -167.6 (dt, *J* 23, 11 Hz), -187.6 (m).

Found: C, 37.53; H, <0.10; N, 3.36. C<sub>26</sub>Cl<sub>2</sub>F<sub>14</sub>N<sub>2</sub>O<sub>2</sub>S<sub>2</sub>Zn requires C, 37.24; H, 0.00; N, 3.34%.

HRMS (APCI) *m/z* Found: 836.7920; C<sub>26</sub>HCl<sub>2</sub>F<sub>14</sub>N<sub>2</sub>O<sub>2</sub>S<sub>2</sub>Zn<sup>+</sup> [M+H<sup>+</sup>] requires 836.7919.

### Zn(Br-FBTZ)<sub>2</sub>

Yellow solid, mp > 300 °C

$\nu_{\max}/\text{cm}^{-1}$  1660, 1479, 1399, 1307, 1264, 1245, 1194, 1133, 1096, 1049, 1001, 930, 824, 772, 748, 691, 638, 630, 605.

$\delta_{\text{F}}$  (367 MHz, DMSO-*d*<sub>6</sub>) -111.5 (dd, *J* 16, 3 Hz), -135.4 (dd, *J* 21, 3 Hz), -142.5 (ddd, *J* 24, 11, 3 Hz), -151.9 (dd, *J* 21, 16 Hz), -159.7 (td, *J* 23, 3 Hz), -167.6 (dt, *J* 23, 11 Hz), -187.6 (td, *J* 23, 12 Hz).

Found: C, 33.56; H, <0.10; N, 3.03. C<sub>26</sub>Br<sub>2</sub>F<sub>14</sub>N<sub>2</sub>O<sub>2</sub>S<sub>2</sub>Zn requires C, 33.67; H, 0.00; N, 3.02%.

HRMS (APCI) *m/z* Found: 924.6912; C<sub>26</sub>Br<sub>2</sub>F<sub>14</sub>N<sub>2</sub>O<sub>2</sub>S<sub>2</sub>ZnH<sup>+</sup> [M+H<sup>+</sup>] requires 924.6909.

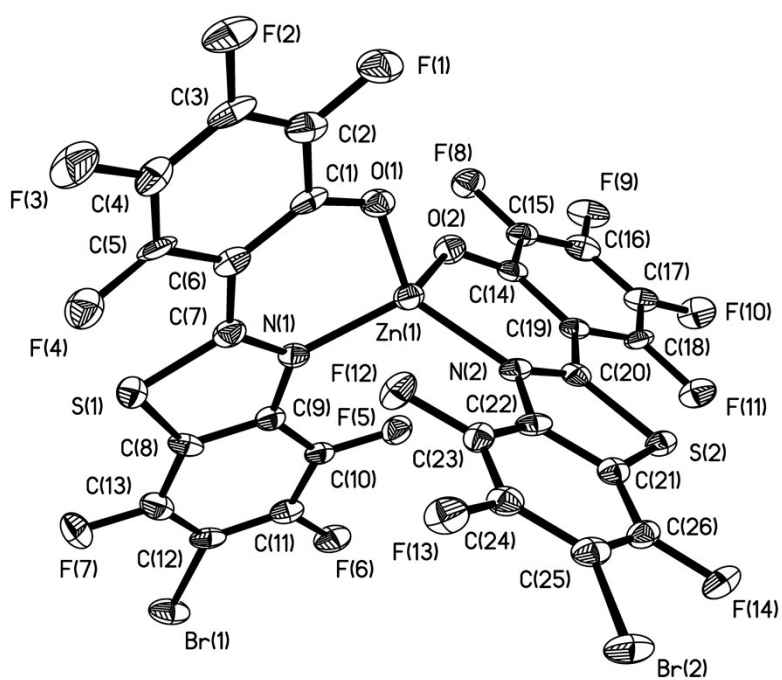

**Fig. S1** X-ray crystal structure of Zn(Br-FBTZ)<sub>2</sub>. The crystal was prepared by sublimation *in vacuo*.

**Table S1. Crystal data and structure refinement for Zn(Br-FBTZ)<sub>2</sub>**

|                                                     |                                                                                                 |                          |
|-----------------------------------------------------|-------------------------------------------------------------------------------------------------|--------------------------|
| Empirical formula                                   | C <sub>26</sub> Br <sub>2</sub> F <sub>14</sub> N <sub>2</sub> O <sub>2</sub> S <sub>2</sub> Zn |                          |
| Formula weight                                      | 927.59                                                                                          |                          |
| Temperature                                         | 100(2) K                                                                                        |                          |
| Wavelength                                          | 0.71073 Å                                                                                       |                          |
| Crystal system                                      | Triclinic                                                                                       |                          |
| Space group                                         | <i>P</i> -1                                                                                     |                          |
| Unit cell dimensions                                | <i>a</i> = 7.7699(18) Å                                                                         | <i>α</i> = 117.280(18)°. |
|                                                     | <i>b</i> = 13.996(3) Å                                                                          | <i>β</i> = 94.333(13)°.  |
|                                                     | <i>c</i> = 14.391(4) Å                                                                          | <i>γ</i> = 104.573(5)°.  |
| Volume                                              | 1312.6(6) Å <sup>3</sup>                                                                        |                          |
| <i>Z</i>                                            | 2                                                                                               |                          |
| Density (calculated)                                | 2.347 Mg/m <sup>3</sup>                                                                         |                          |
| Absorption coefficient                              | 4.274 mm <sup>-1</sup>                                                                          |                          |
| <i>F</i> (000)                                      | 888                                                                                             |                          |
| Crystal size                                        | 0.160 x 0.090 x 0.050 mm <sup>3</sup>                                                           |                          |
| Theta range for data collection                     | 1.633 to 27.984°.                                                                               |                          |
| Index ranges                                        | -10 ≤ <i>h</i> ≤ 10, -18 ≤ <i>k</i> ≤ 18, -18 ≤ <i>l</i> ≤ 18                                   |                          |
| Reflections collected                               | 20198                                                                                           |                          |
| Independent reflections                             | 6136 [ <i>R</i> (int) = 0.0765]                                                                 |                          |
| Completeness to theta = 25.242°                     | 99.9 %                                                                                          |                          |
| Refinement method                                   | Full-matrix least-squares on <i>F</i> <sup>2</sup>                                              |                          |
| Data / restraints / parameters                      | 6136 / 0 / 443                                                                                  |                          |
| Goodness-of-fit on <i>F</i> <sup>2</sup>            | 1.025                                                                                           |                          |
| Final <i>R</i> indices [ <i>I</i> > 2σ( <i>I</i> )] | <i>R</i> 1 = 0.0622, <i>wR</i> 2 = 0.1460                                                       |                          |
| <i>R</i> indices (all data)                         | <i>R</i> 1 = 0.1108, <i>wR</i> 2 = 0.1671                                                       |                          |
| Largest diff. peak and hole                         | 1.836 and -1.084 e Å <sup>-3</sup>                                                              |                          |

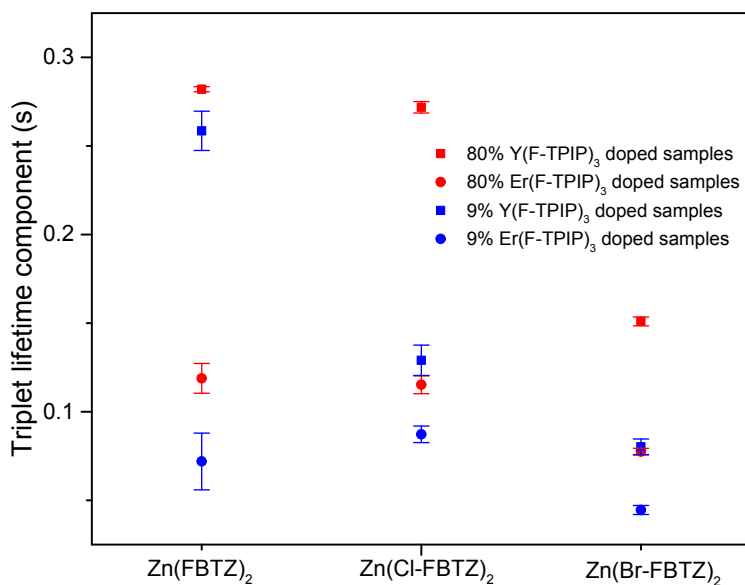

**Fig. S2** Triplet lifetime components measured at 80K by a 5 ns pulse laser for Y(F-TPIP)<sub>3</sub>, Er(F-TPIP)<sub>3</sub> co-doped with Zn(FBTZ)<sub>2</sub>, Zn(Cl-FBTZ)<sub>2</sub> and Zn(Br-FBTZ)<sub>2</sub> respectively. The monitored wavelength is set at 560 nm and the excitation wavelength is 410 nm.

Samples diluted with increasing Y(F-TPIP)<sub>3</sub> concentrations show longer triplet lifetimes, which suggests a reduced effect of triplet-triplet annihilation (TTA) in these samples. Meanwhile, the incorporation of heavier halogen atoms causes a decrease in the triplet lifetime for all Y(F-TPIP)<sub>3</sub> doped films; this indicates that the substitution introduces more efficient spin-coupling due to the heavy atom effect, hence more efficient intersystem crossing (ISC). The Er(F-TPIP)<sub>3</sub> doped samples show consistently shorter triplet lifetimes compared to their Y(F-TPIP)<sub>3</sub> doped counterparts which implies efficient energy transfer from chromophore to erbium ions. Moreover, the fact that the 80% Er(F-TPIP)<sub>3</sub> doped samples still have longer triplet lifetime than 9% Er(F-TPIP)<sub>3</sub> doped samples indicates the TTA process and the coupling from triplets to erbium ions are competitive in these samples. The triplet lifetime measured by the 5 ns pulse laser is consistent with the result measured by a 407 nm CW laser with 50 ms pulse width.

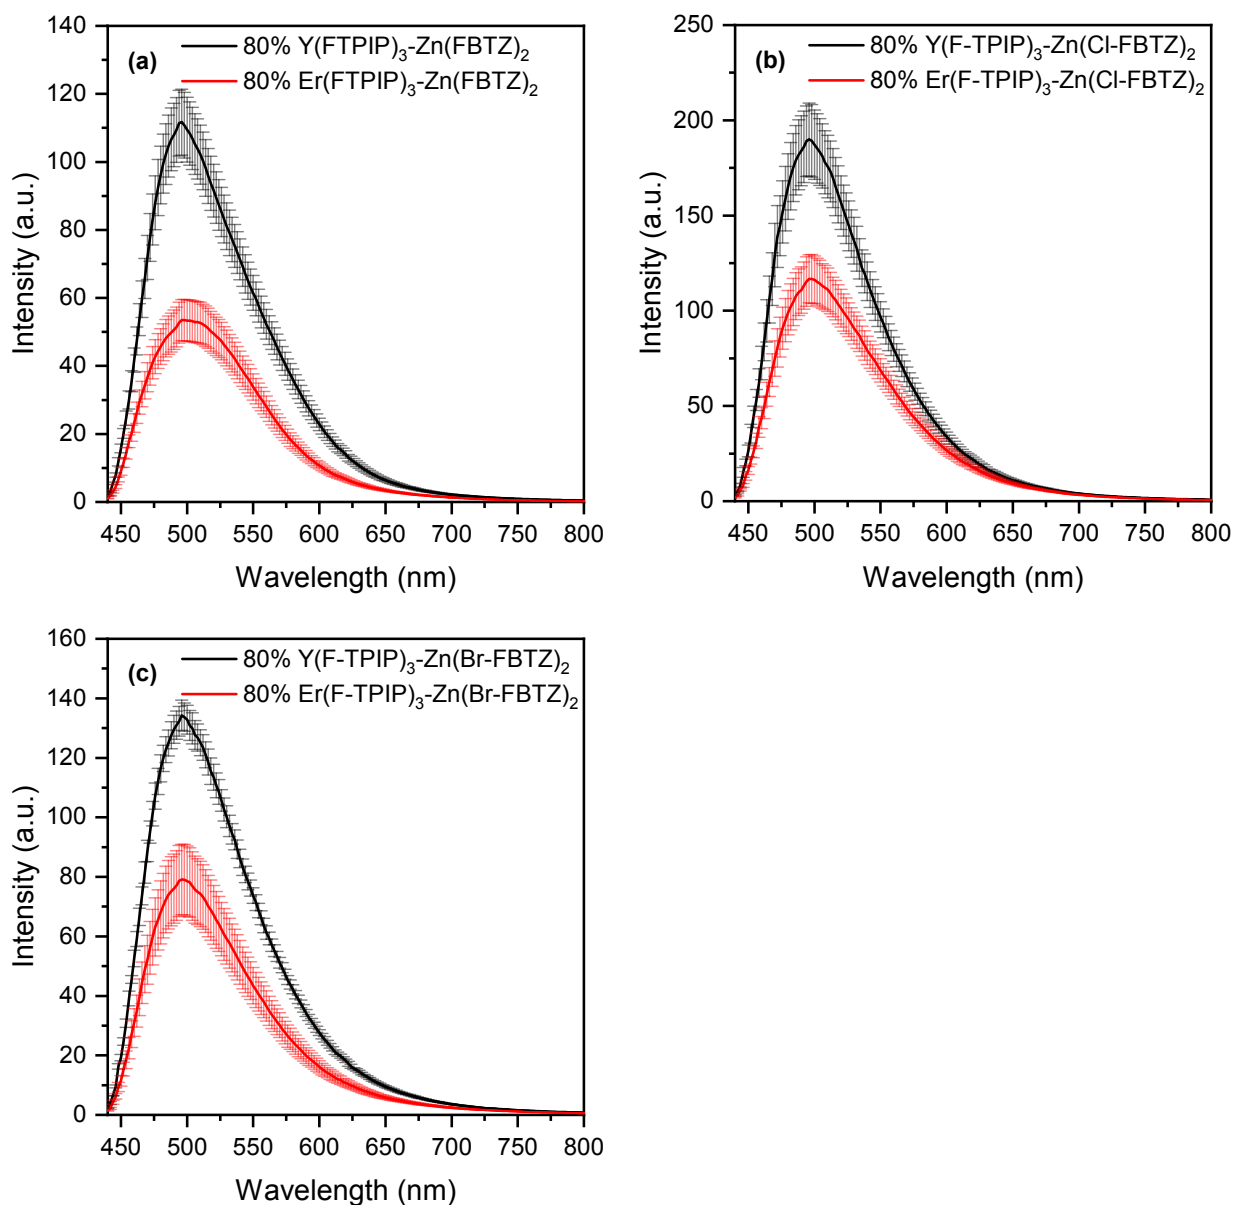

**Fig. S3** Photoluminescence spectra comparison between  $\text{Y}(\text{F-TPIP})_3$  doped and  $\text{Er}(\text{F-TPIP})_3$  doped  $\text{Zn}(\text{FBTZ})_2$ ,  $\text{Zn}(\text{Cl-FBTZ})_2$  and  $\text{Zn}(\text{Br-FBTZ})_2$  samples at room temperature.

The photoluminescence spectra were recorded at room temperature using a 407 nm CW laser as the excitation light source. The optical path was kept identical during the measurement to have comparable results with the samples mounted behind an aperture in a fixed sample plate. In order to obtain quantitative differences in intensity between a pair of sample each sample was measured three times with alternate measurements on a  $\text{Y}(\text{F-TPIP})_3$  doped sample and then the corresponding  $\text{Er}(\text{F-TPIP})_3$  doped sample. The data obtained from the three measurements were averaged and the standard error for each set of measurements used as the error bars in Fig. S3. As shown in Fig. S3, the erbium ions can effectively quench singlet emission for all three chromophores, which indicates energy transfer from singlets to erbium ions.

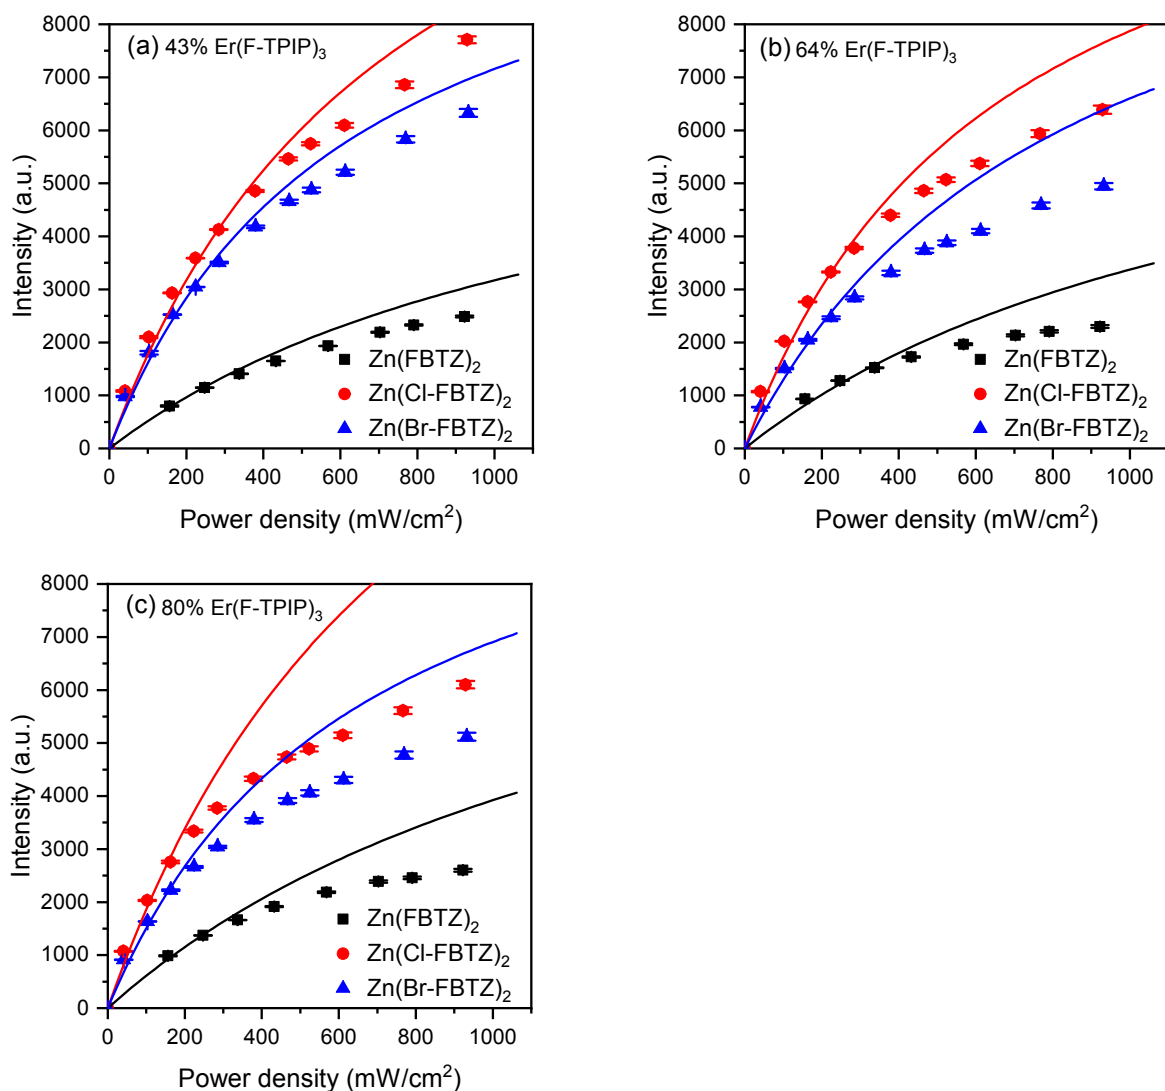

**Fig. S4** Sensitisation data for the (a) 43%, (b) 64% and (c) 80% Er(F-TPIP)<sub>3</sub> doped films for each chromophore. The solid lines are the fits from the model.

At higher erbium concentrations the data starts to fall below the model predictions at high 407 nm pump intensities due to the contribution of Er-Er interactions as an additional quenching route. The erbium-erbium interactions become more significant as Er(F-TPIP)<sub>3</sub> concentration and excitation power increase.

## References

- S1. E. V. Shchegol'kov, I. V. Shchur, Y. V. Burgart, V. I. Saloutin, S. Yu. Solodnikov, O. P. Krasnykh and M. A. Kravchenko, *Bioorg. Med. Chem. Lett.*, 2016, **26**, 2455-2458.
- S2 Z. Li, A. Dellali, J. Malik, M. Motevalli, R. M. Nix, T. Olukoya, Y. Peng, H. Ye, W. P. Gillin and I. Hernández, *Inorganic Chemistry*, 2013, **52**, 1379-1387.
